# Supplementary material for: Fractal analysis of geomagnetic data to decipher pre-earthquake processes in the Andaman–Nicobar region, India
Source: Copernicus journal article supplement (doi:10.5194/npg-32-1-2025), 2025-01-07
Supplement: Supplementary file 1 [file npg-32-1-2025-supplement.pdf]

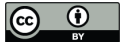

*Supplement of*

## **Fractal analysis of geomagnetic data to decipher pre-earthquake processes in the Andaman–Nicobar region, India**

**Rahul Prajapati and Kusumita Arora**

*Correspondence to:* Rahul Prajapati (rahulphy007@gmail.com)

The copyright of individual parts of the supplement might differ from the article licence.

## Supplementary materials

### Synthetic test of monofractal and multifractal method:

For the numerical simulation or synthetic test of fractal and multifractal analysis, we preferred to simulate three different types of monofractal signals with known Hurst exponent  $h_1(0.2)$ ,  $h_2(0.4)$ ,  $h_3(0.6)$ , and a multifractal signal  $h_4$  (addition of  $h_1$ ,  $h_2$ , and  $h_3$  in series). The smaller Hurst exponent indicates the less correlated signal or noisier than signal of large Hurst exponent which indicates high correlated or smoother (Figure S1). From the theoretical approach, the fractal dimension of noisier or less correlated signal should be larger than smoother or correlated signal. The fractal dimension of  $h_1$ ,  $h_2$ , and  $h_3$  calculated from Higuchi method is 1.7, 1.6, and 1.4, while for  $h_4$  is 1.6 (Figure S2). For multifractal signal  $h_4$ , the fractal dimension is lower than the  $h_3$  even it is more heterogeneous than  $h_3$ . From the concept of multifractal, the noisier or heterogeneous signal encompasses through higher degree of multifractal nature and large spectrum width than the spectrum width of less disturb or smooth signal i.e. spectrum width of  $h_4 > h_1 > h_2 > h_3$ . The spectrum width computed with the same procedure as discussed above is shown in Figure S3, which clearly deciphers that the spectrum width of  $h_4 > h_1 > h_2 > h_3$ . Thus, the multifractal analysis shows the true and generalised nature of heterogeneity of multifractal signal from width of spectrum. Thus, fractal and multifractal approach tested over known synthetic signal indicates the efficacy of method to reveal the degree of complexity or heterogeneity or disturbances in signals.

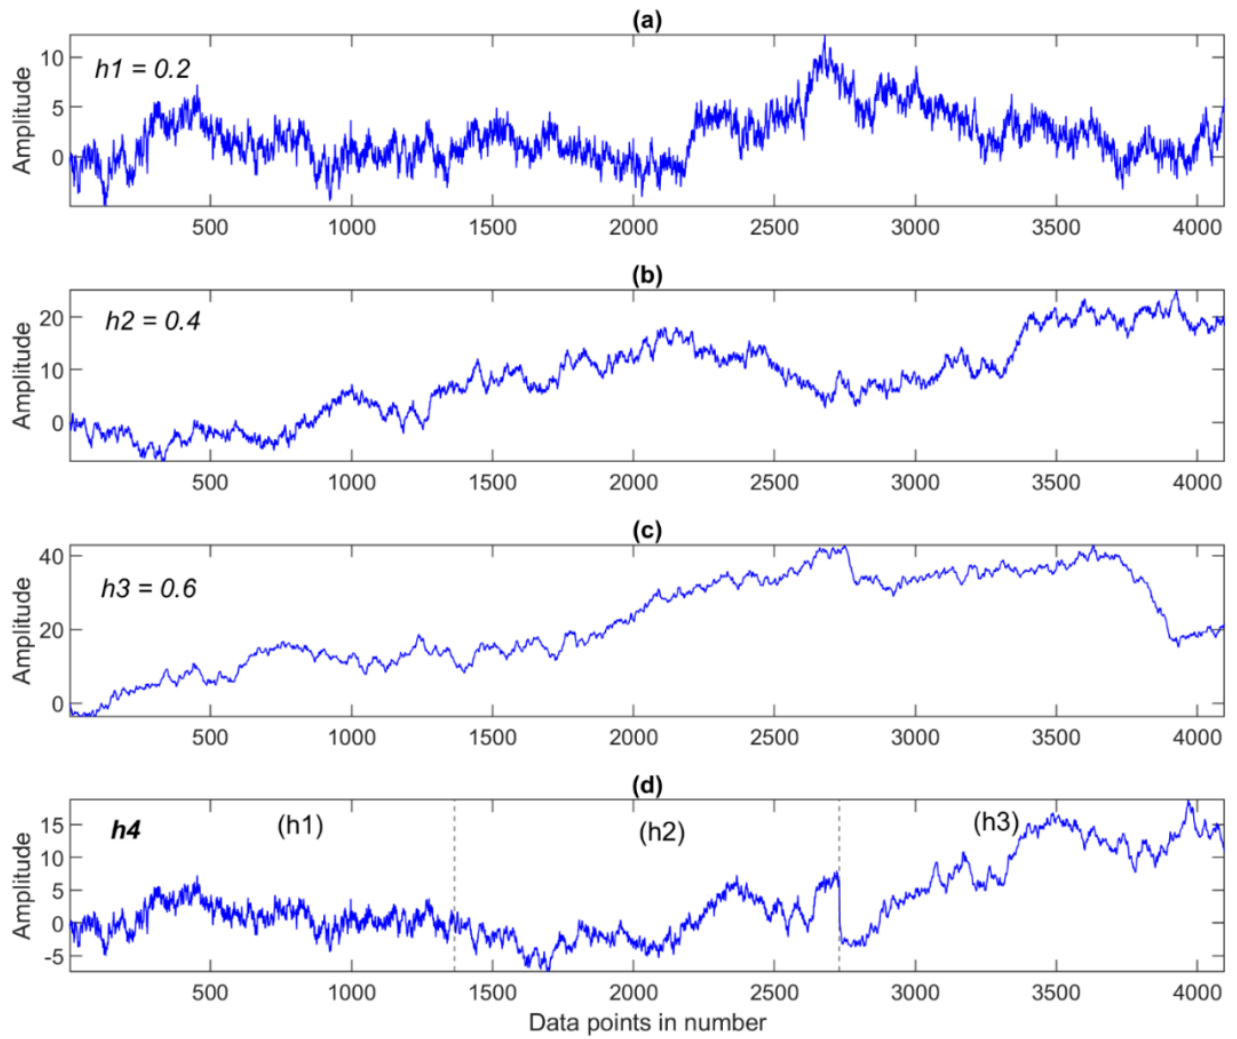

**Figure S1.** The synthetic signal generated at Hurst exponent (a) 0.2, (b) 0.4, (c) 0.5, and (d) combination of all three in series.

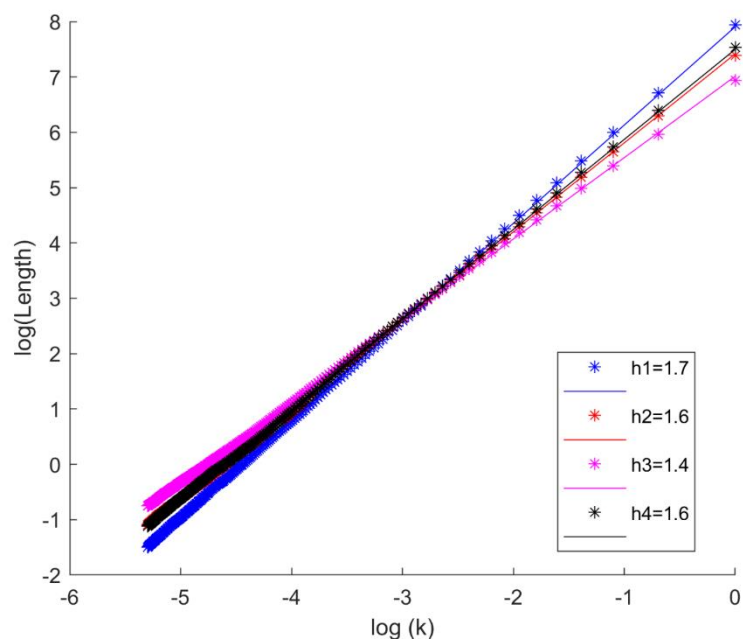

**Figure S2.** Fractal dimension of synthetic signal h1, h2, h3, and h4 from Higuchi method.

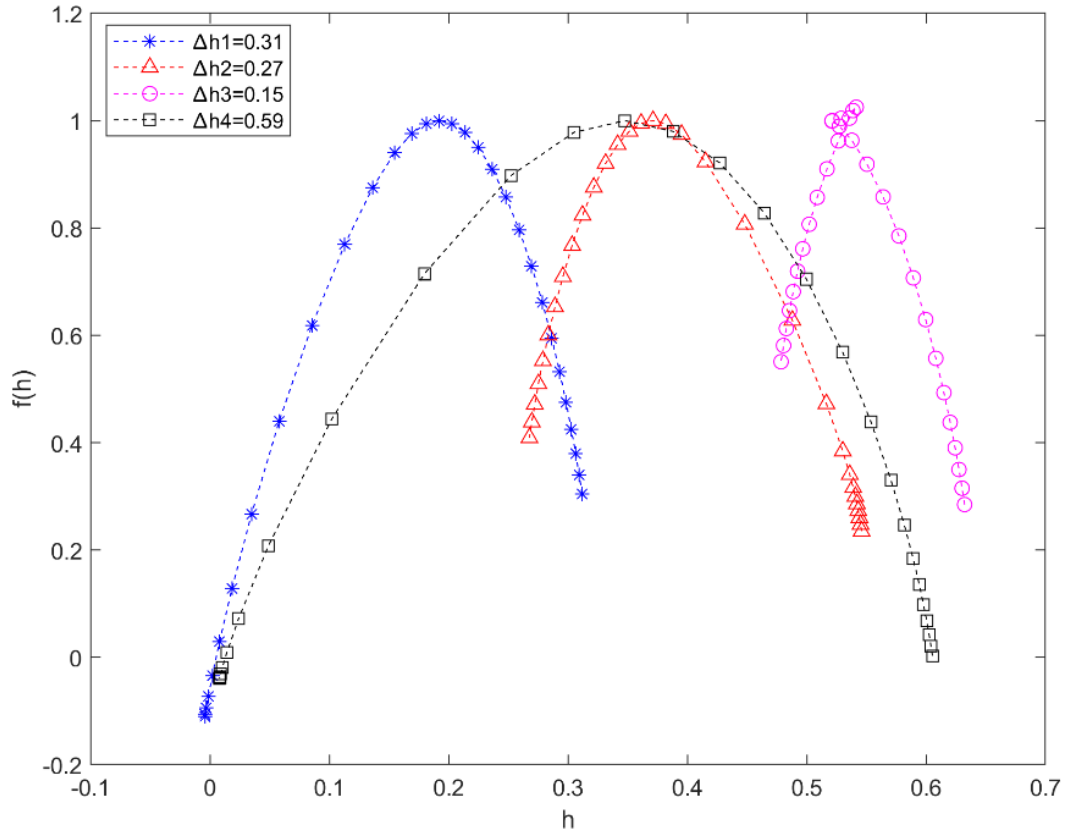

**Figure S3.** The multifractal spectrum of signal h1, h2, h3, and h4 showing the degree of multifractality.

**Figures of fractal and multifractal component's variation of each month:**

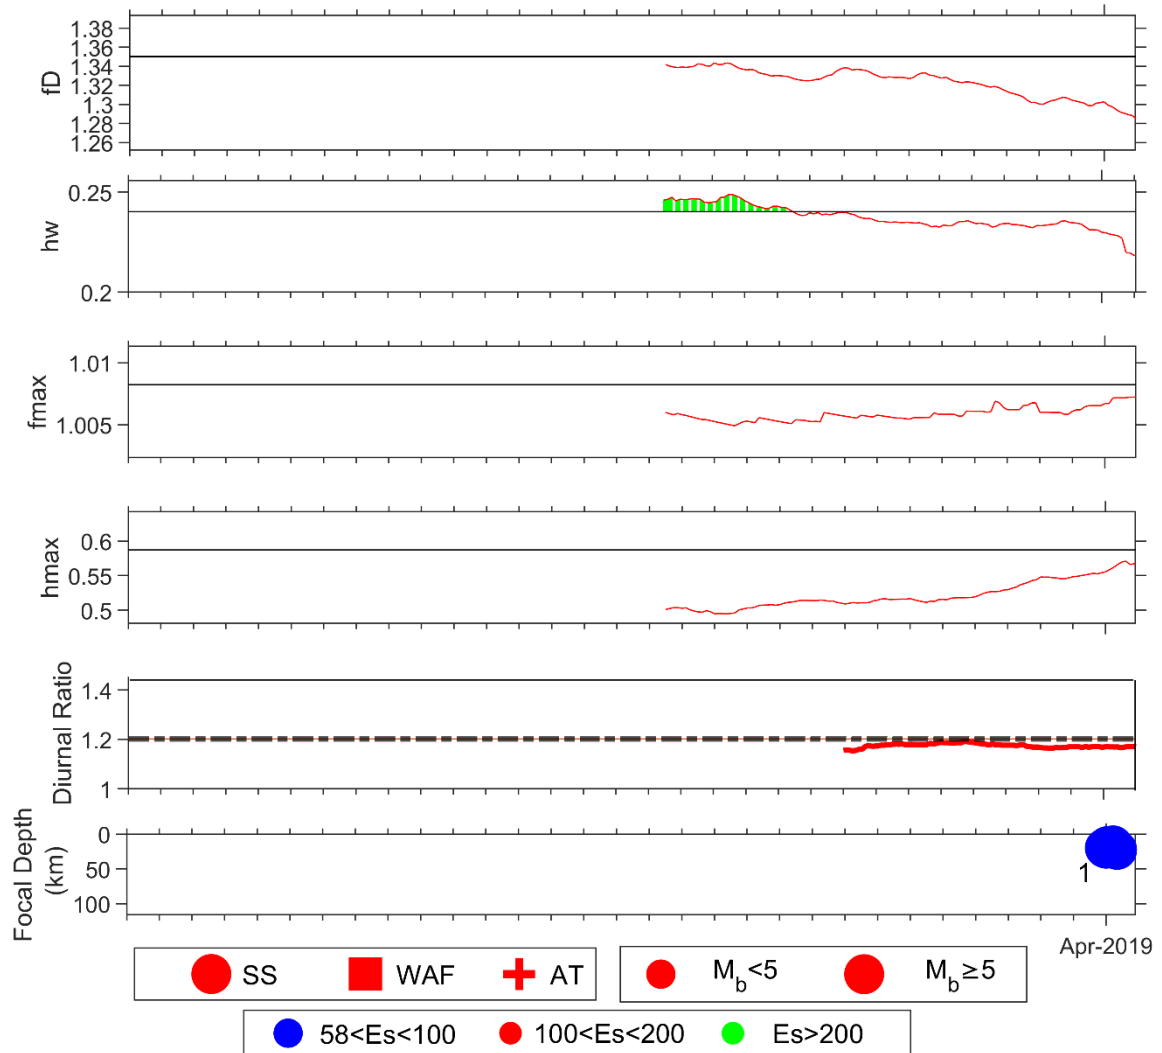

**Figure S4.** The temporal variation for March-2019 of components monofractal analysis (a) Higuchi fractal dimension, and multifractal analysis (b) spectrum width component, (c) fmax component, (d) hmax components. Panel (e) and (f) showing the diurnal ratio component and occurrences of earthquakes in same time duration with magnitude and focal depth respectively. The significant enhancements from each component are shaded by green color.

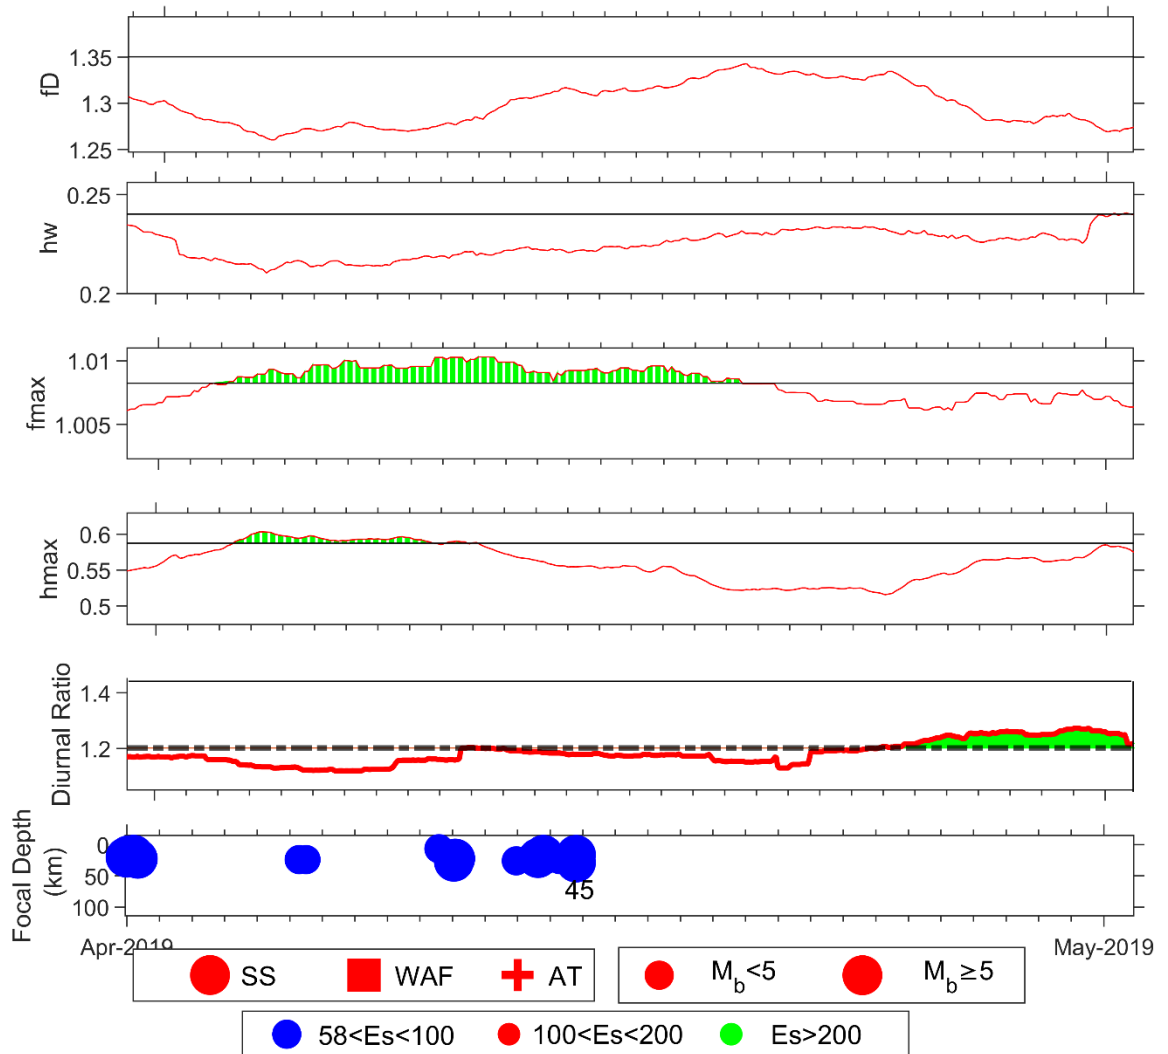

**Figure S5.** The temporal variation for April-2019 of components monofractal analysis (a) Higuchi fractal dimension, and multifractal analysis (b) spectrum width component, (c) fmax component, (d) hmax components. Panel (e) and (f) showing the diurnal ratio component and occurrences of earthquakes in same time duration with magnitude and focal depth respectively. The significant enhancements from each component are shaded by green color.

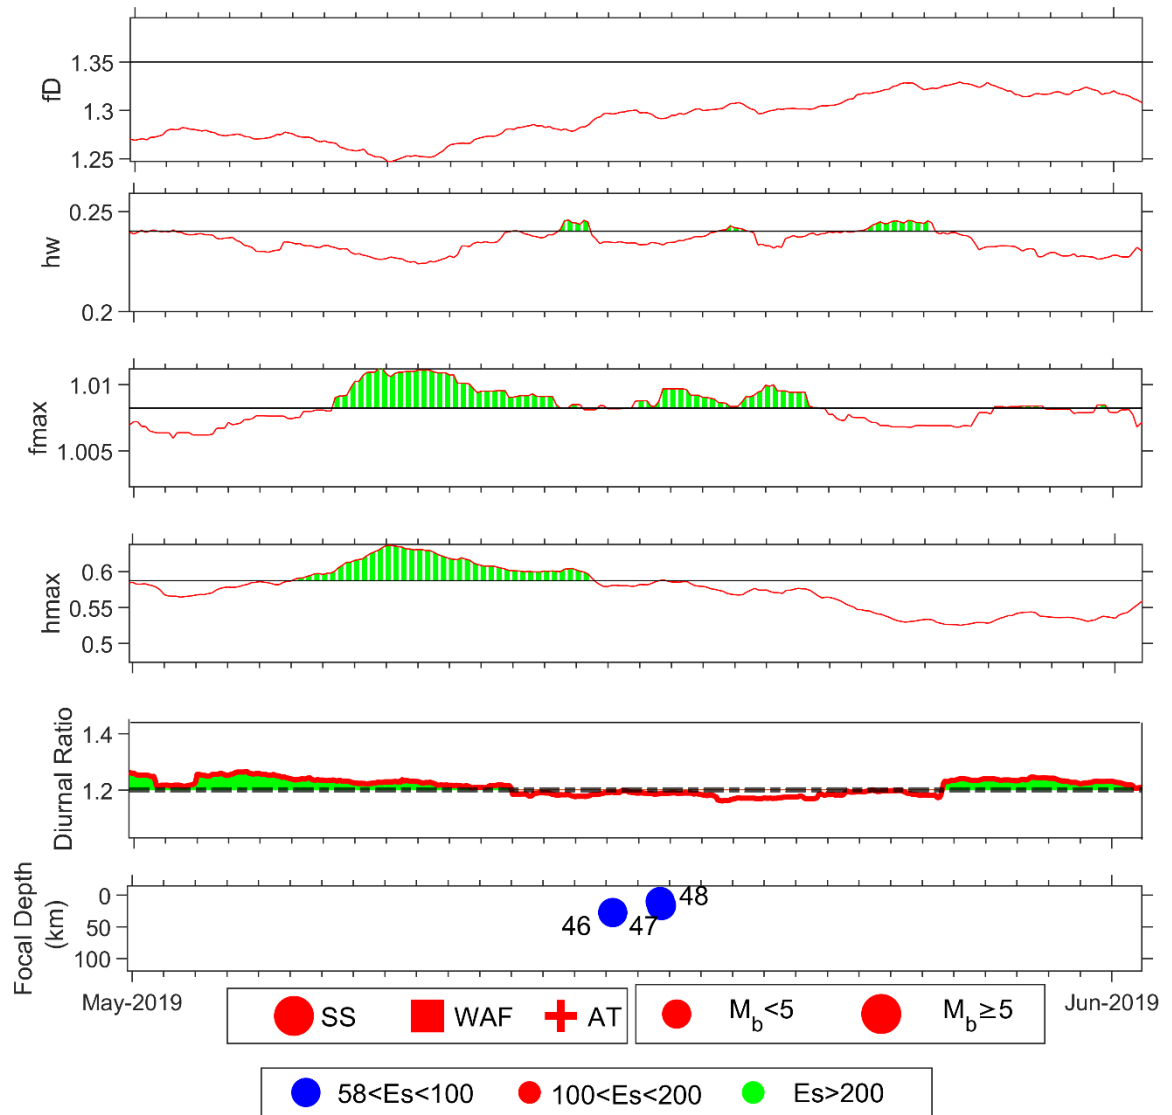

**Figure S6.** The temporal variation for May-2019 of components monofractal analysis (a) Higuchi fractal dimension, and multifractal analysis (b) spectrum width component, (c) fmax component, (d) hmax components. Panel (e) and (f) showing the diurnal ratio component and occurrences of earthquakes in same time duration with magnitude and focal depth respectively. The significant enhancements from each component are shaded by green color.

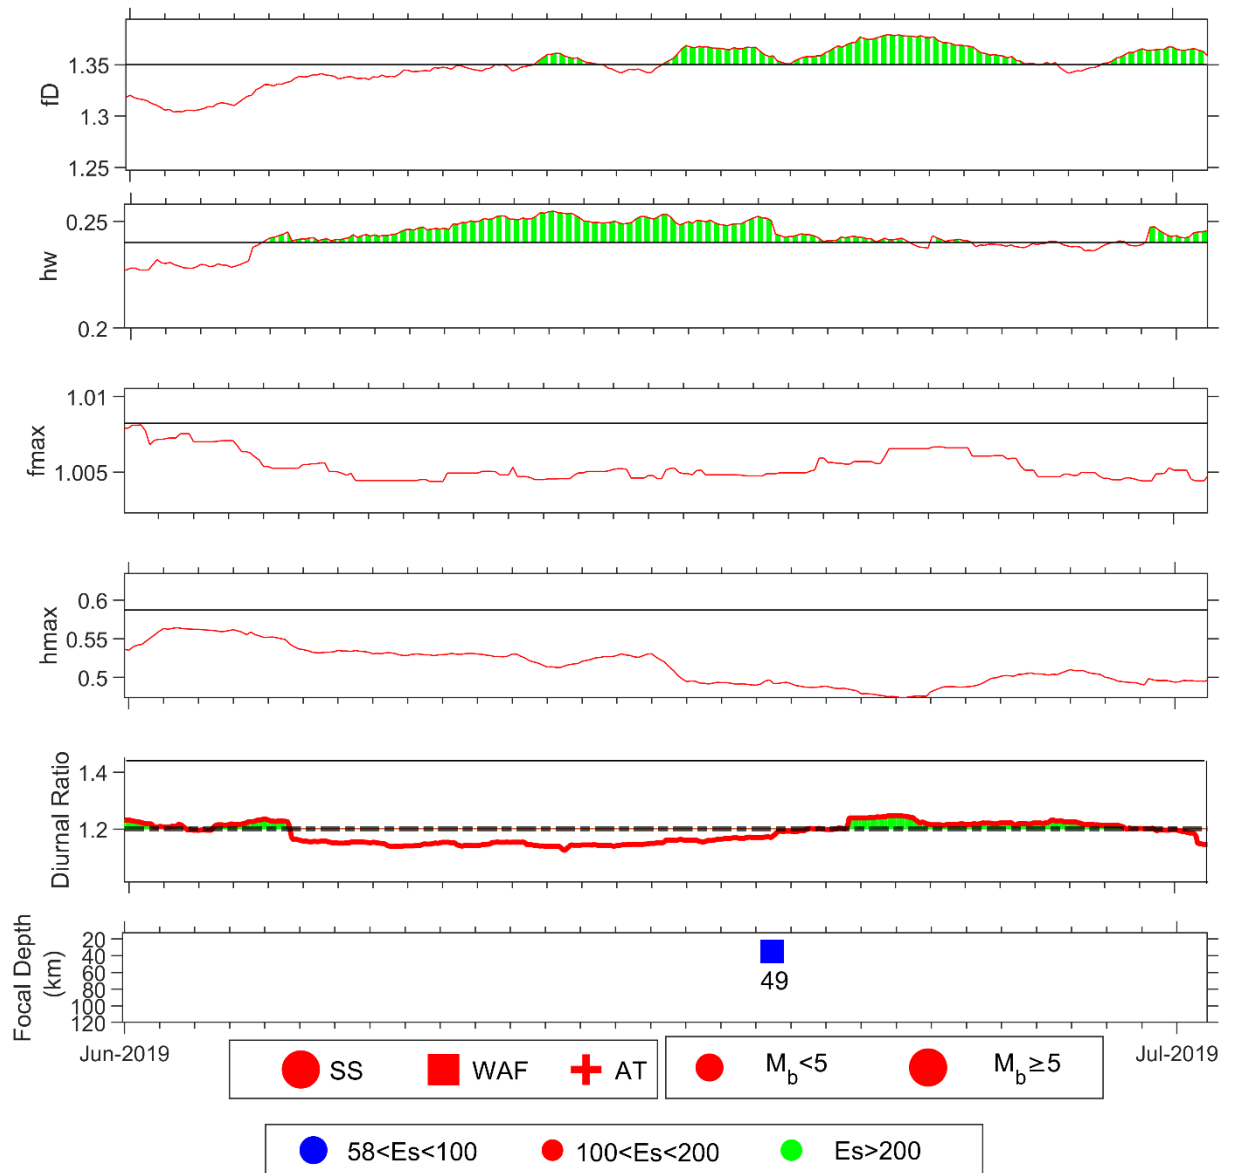

**Figure S7.** The temporal variation for Jun-2019 of components monofractal analysis (a) Higuchi fractal dimension, and multifractal analysis (b) spectrum width component, (c) fmax component, (d) hmax components. Panel (e) and (f) showing the diurnal ratio component and occurrences of earthquakes in same time duration with magnitude and focal depth respectively. The significant enhancements from each component are shaded by green color.



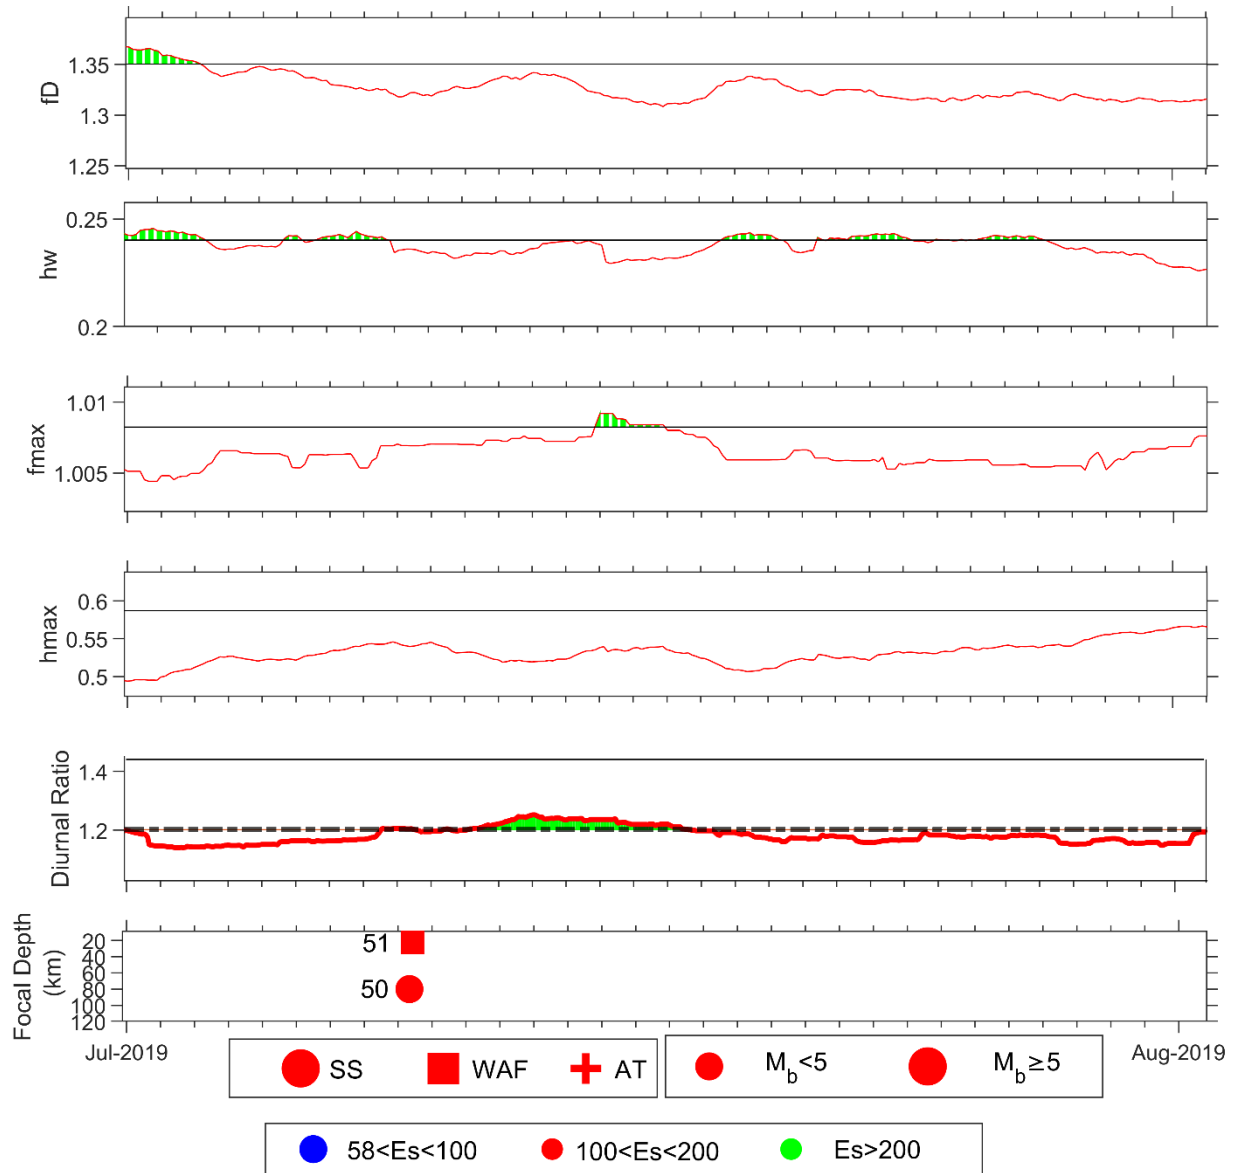

**Figure S8.** The temporal variation for Jul-2019 of components monofractal analysis (a) Higuchi fractal dimension, and multifractal analysis (b) spectrum width component, (c) fmax component, (d) hmax components. Panel (e) and (f) showing the diurnal ratio component and occurrences of earthquakes in same time duration with magnitude and focal depth respectively. The significant enhancements from each component are shaded by green color.

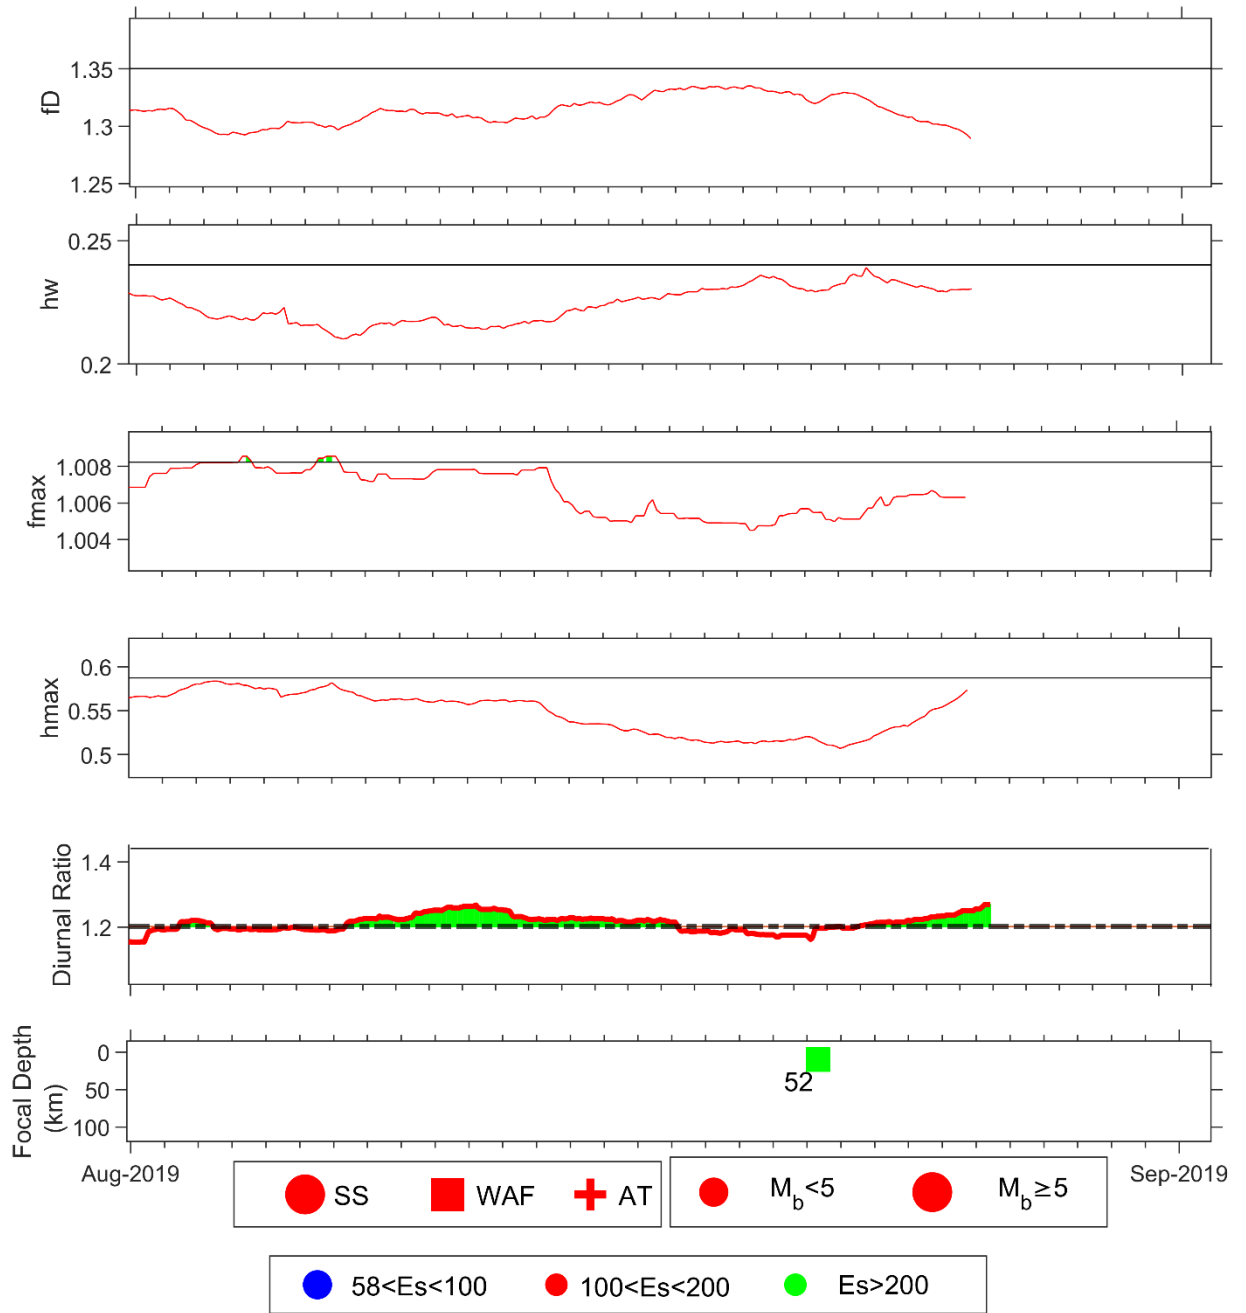

**Figure S9.** The temporal variation for Aug-2019 of components monofractal analysis (a) Higuchi fractal dimension, and multifractal analysis (b) spectrum width component, (c) fmax component, (d) hmax components. Panel (e) and (f) showing the diurnal ratio component and occurrences of earthquakes in same time duration with magnitude and focal depth respectively. The significant enhancements from each component are shaded by green color.

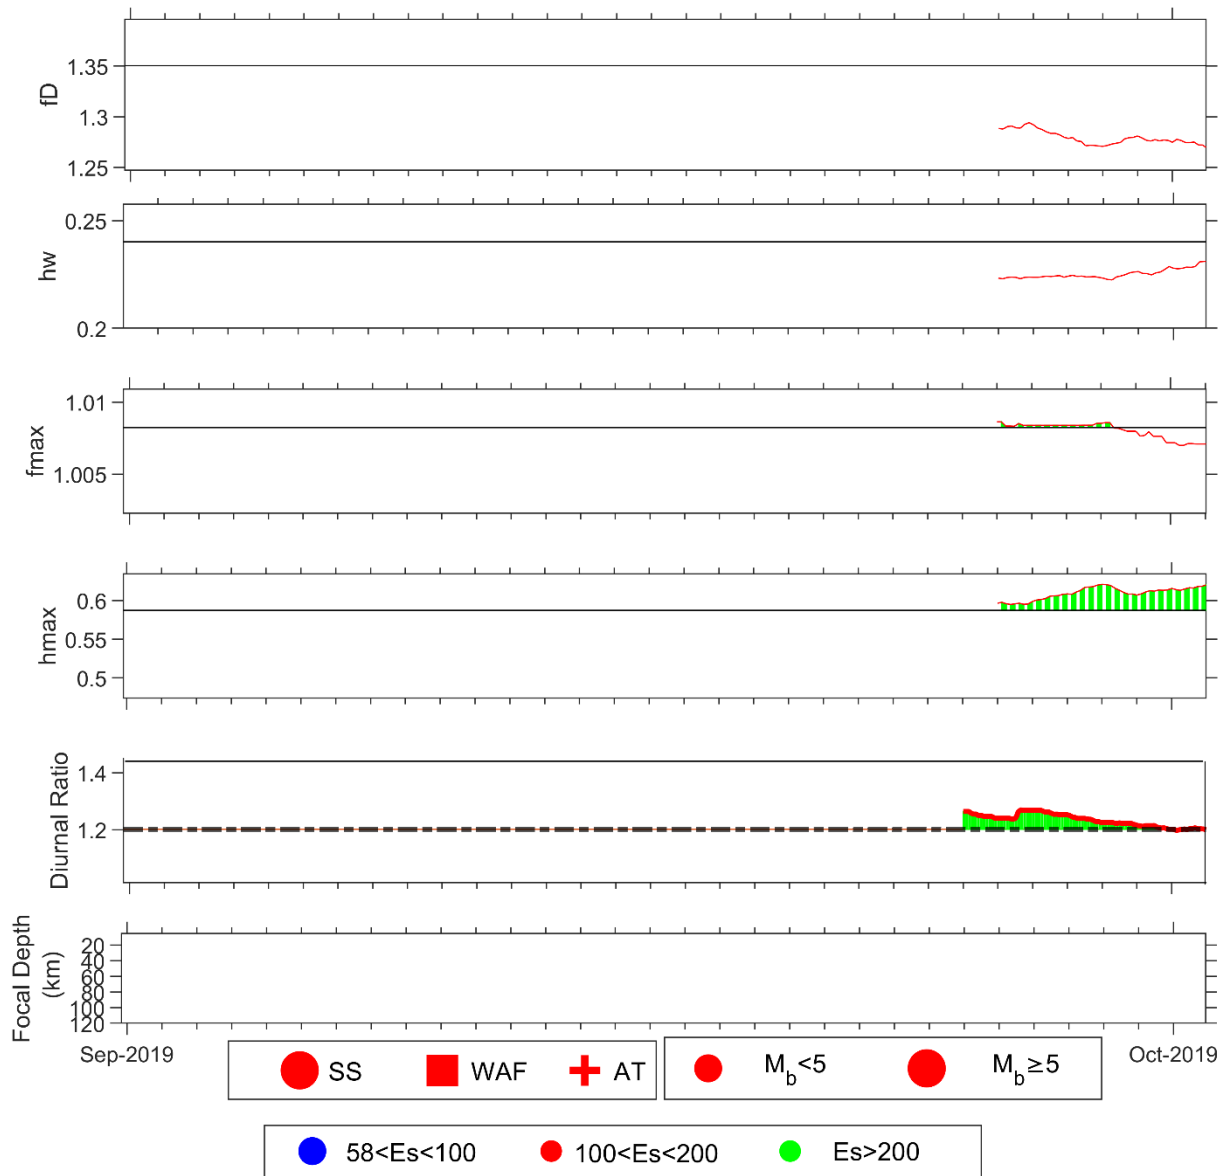

**Figure S10.** The temporal variation for Sep-2019 of components monofractal analysis (a) Higuchi fractal dimension, and multifractal analysis (b) spectrum width component, (c) fmax component, (d) hmax components. Panel (e) and (f) showing the diurnal ratio component and occurrences of earthquakes in same time duration with magnitude and focal depth respectively. The significant enhancements from each component are shaded by green color.

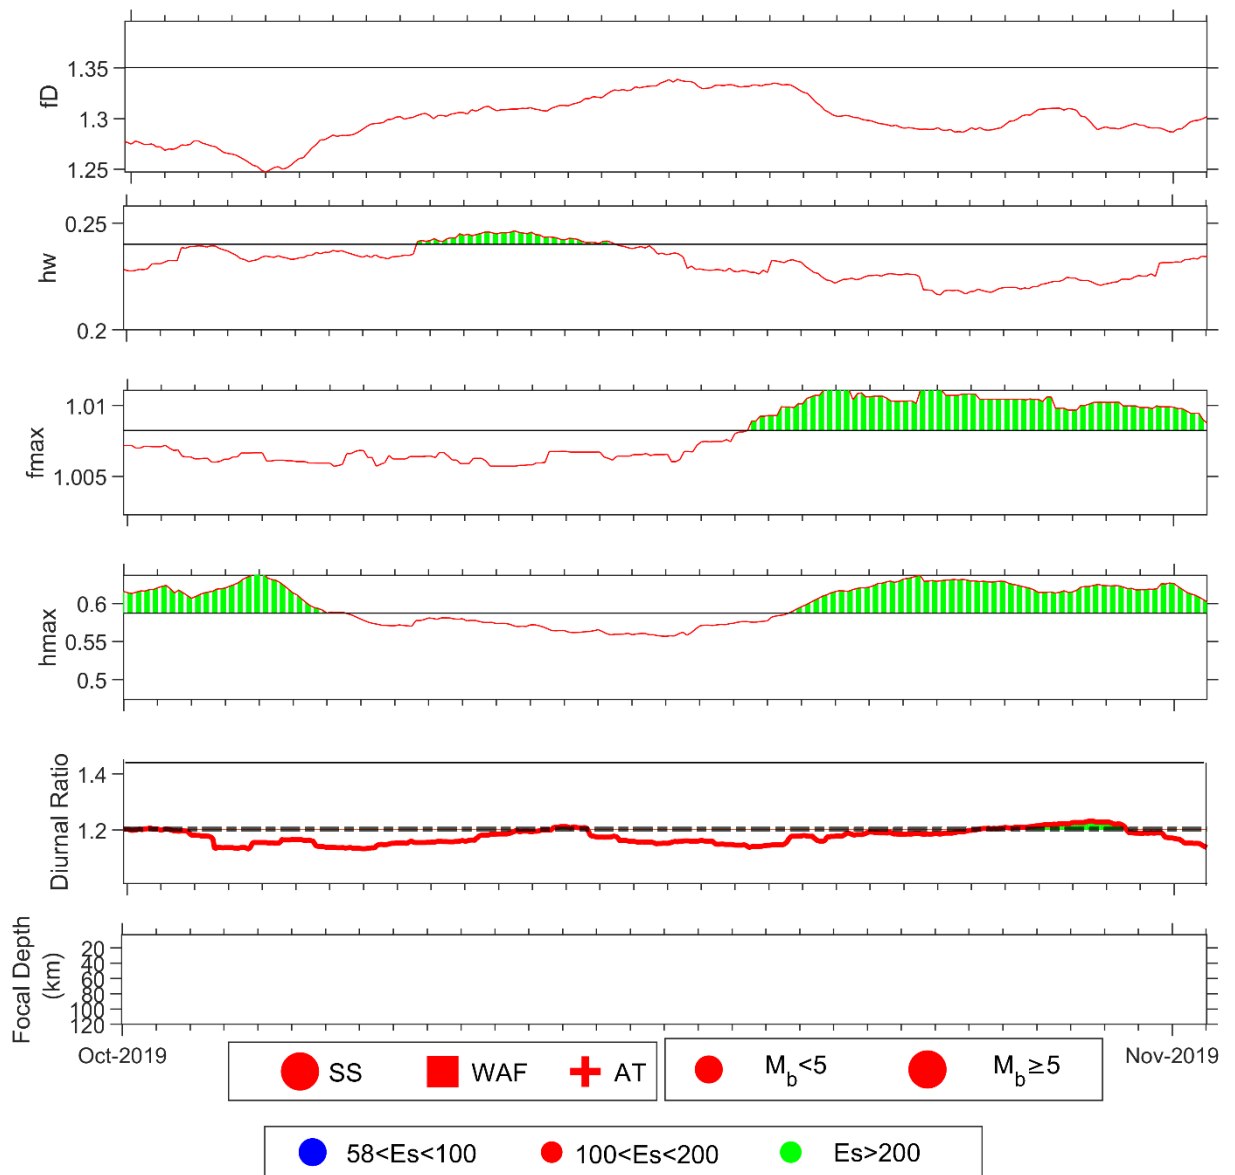

**Figure S11.** The temporal variation for Oct-2019 of components monofractal analysis (a) Higuchi fractal dimension, and multifractal analysis (b) spectrum width component, (c) fmax component, (d) hmax components. Panel (e) and (f) showing the diurnal ratio component and occurrences of earthquakes in same time duration with magnitude and focal depth respectively. The significant enhancements from each component are shaded by green color.

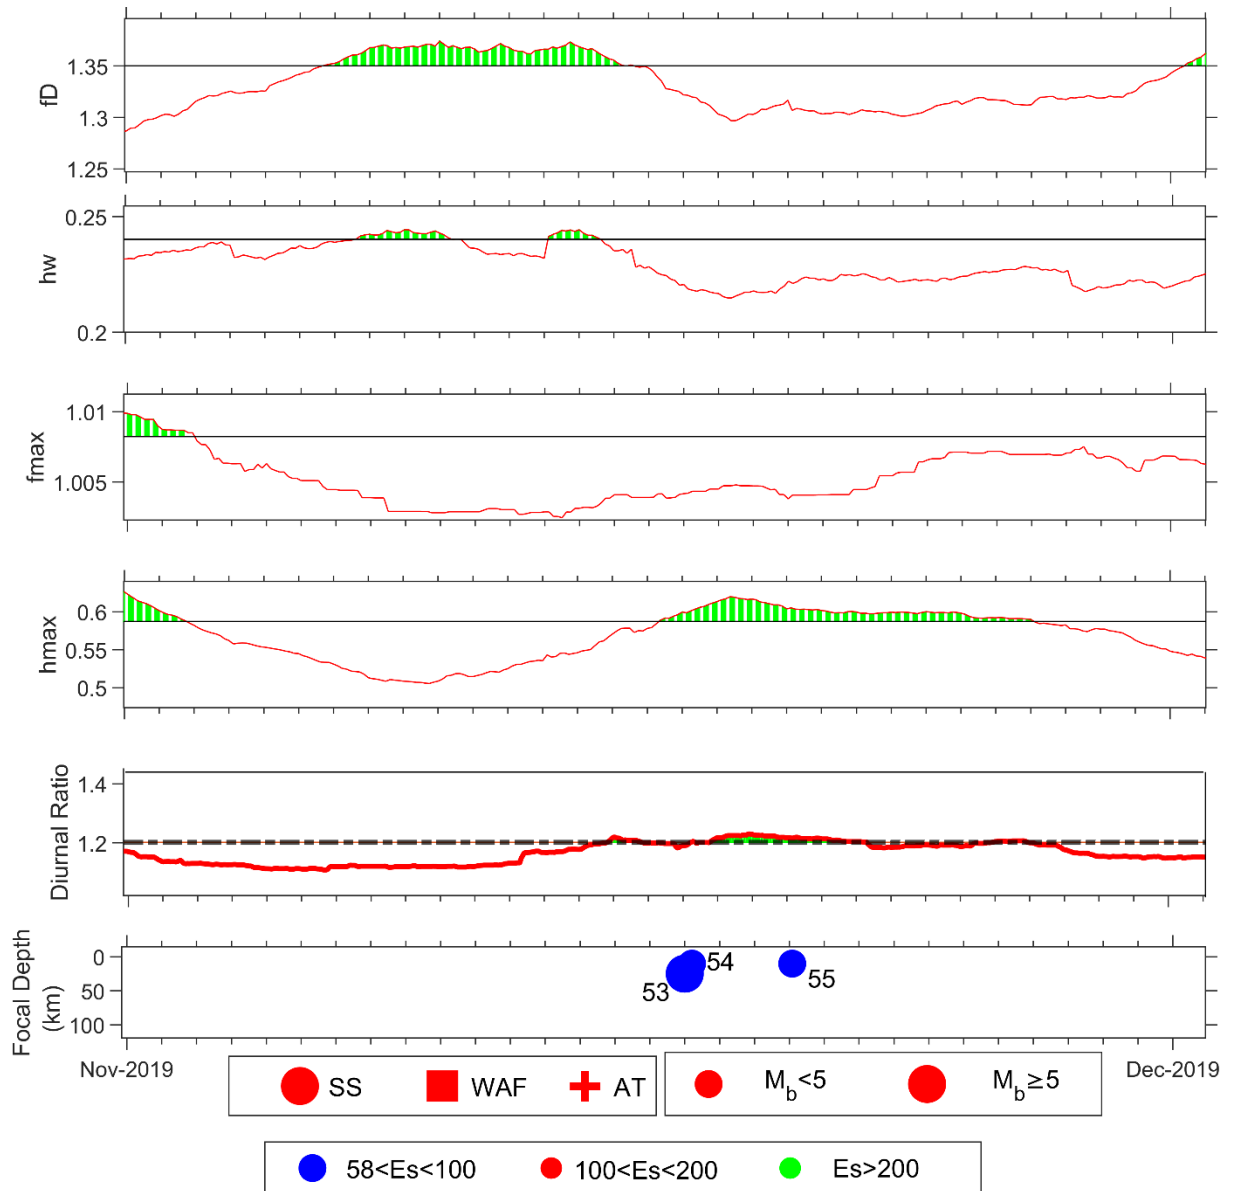

**Figure S12.** The temporal variation for Nov-2019 of components monofractal analysis (a) Higuchi fractal dimension, and multifractal analysis (b) spectrum width component, (c) fmax component, (d) hmax components. Panel (e) and (f) showing the diurnal ratio component and occurrences of earthquakes in same time duration with magnitude and focal depth respectively. The significant enhancements from each component are shaded by green color.

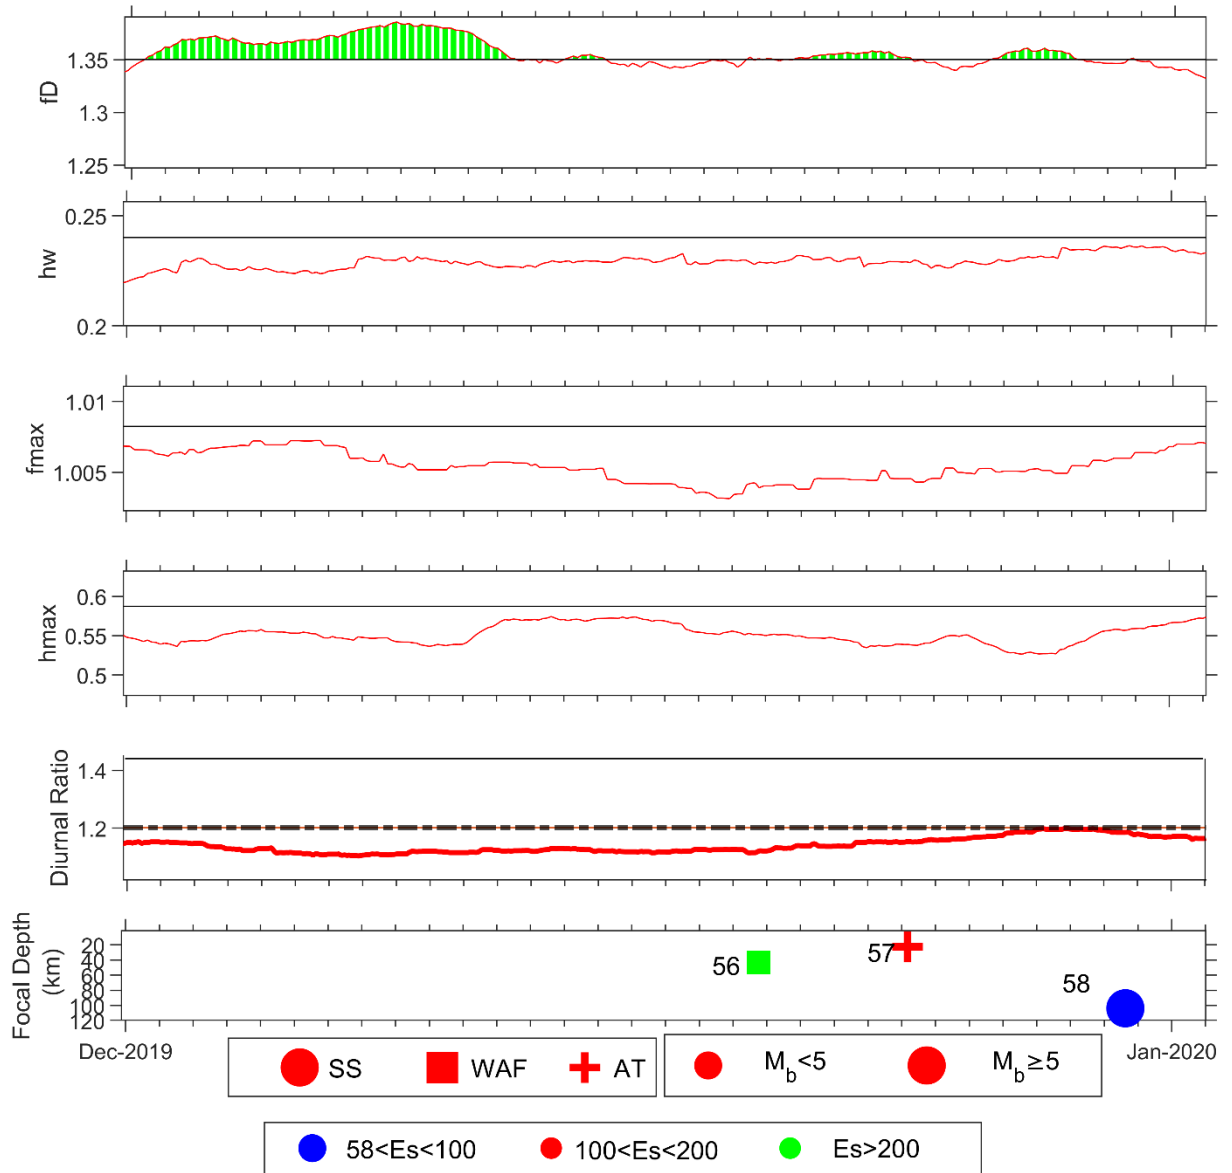

**Figure S13.** The temporal variation for Dec-2019 of components monofractal analysis (a) Higuchi fractal dimension, and multifractal analysis (b) spectrum width component, (c) fmax component, (d) hmax components. Panel (e) and (f) showing the diurnal ratio component and occurrences of earthquakes in same time duration with magnitude and focal depth respectively. The significant enhancements from each component are shaded by green color.

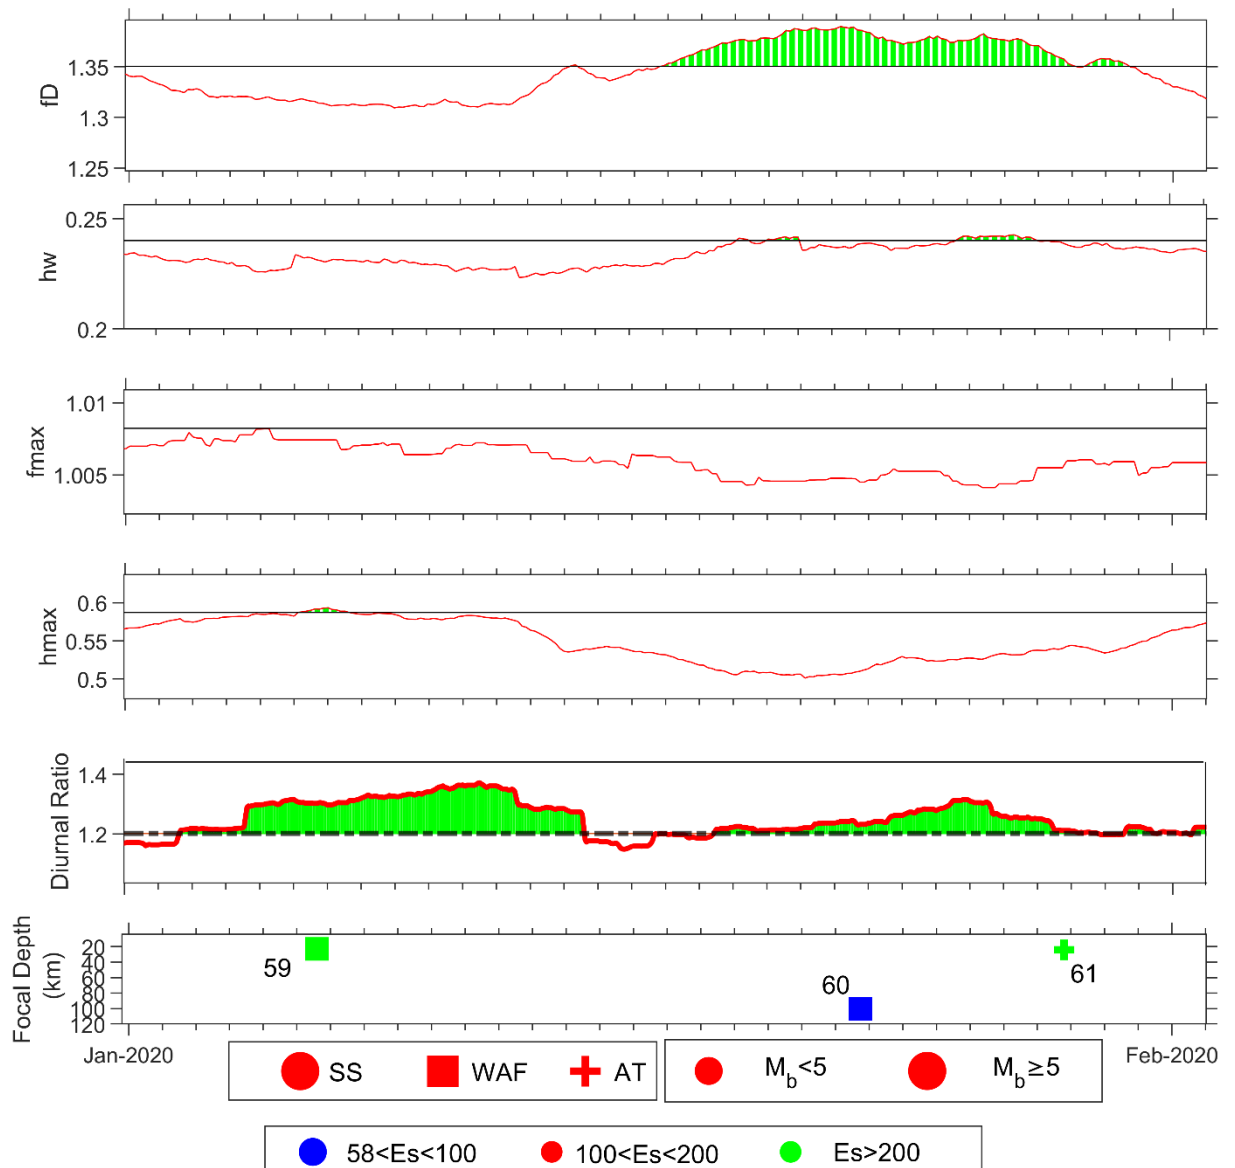

**Figure S14.** The temporal variation for Jan-2020 of components monofractal analysis (a) Higuchi fractal dimension, and multifractal analysis (b) spectrum width component, (c) fmax component, (d) hmax components. Panel (e) and (f) showing the diurnal ratio component and occurrences of earthquakes in same time duration with magnitude and focal depth respectively. The significant enhancements from each component are shaded by green color.

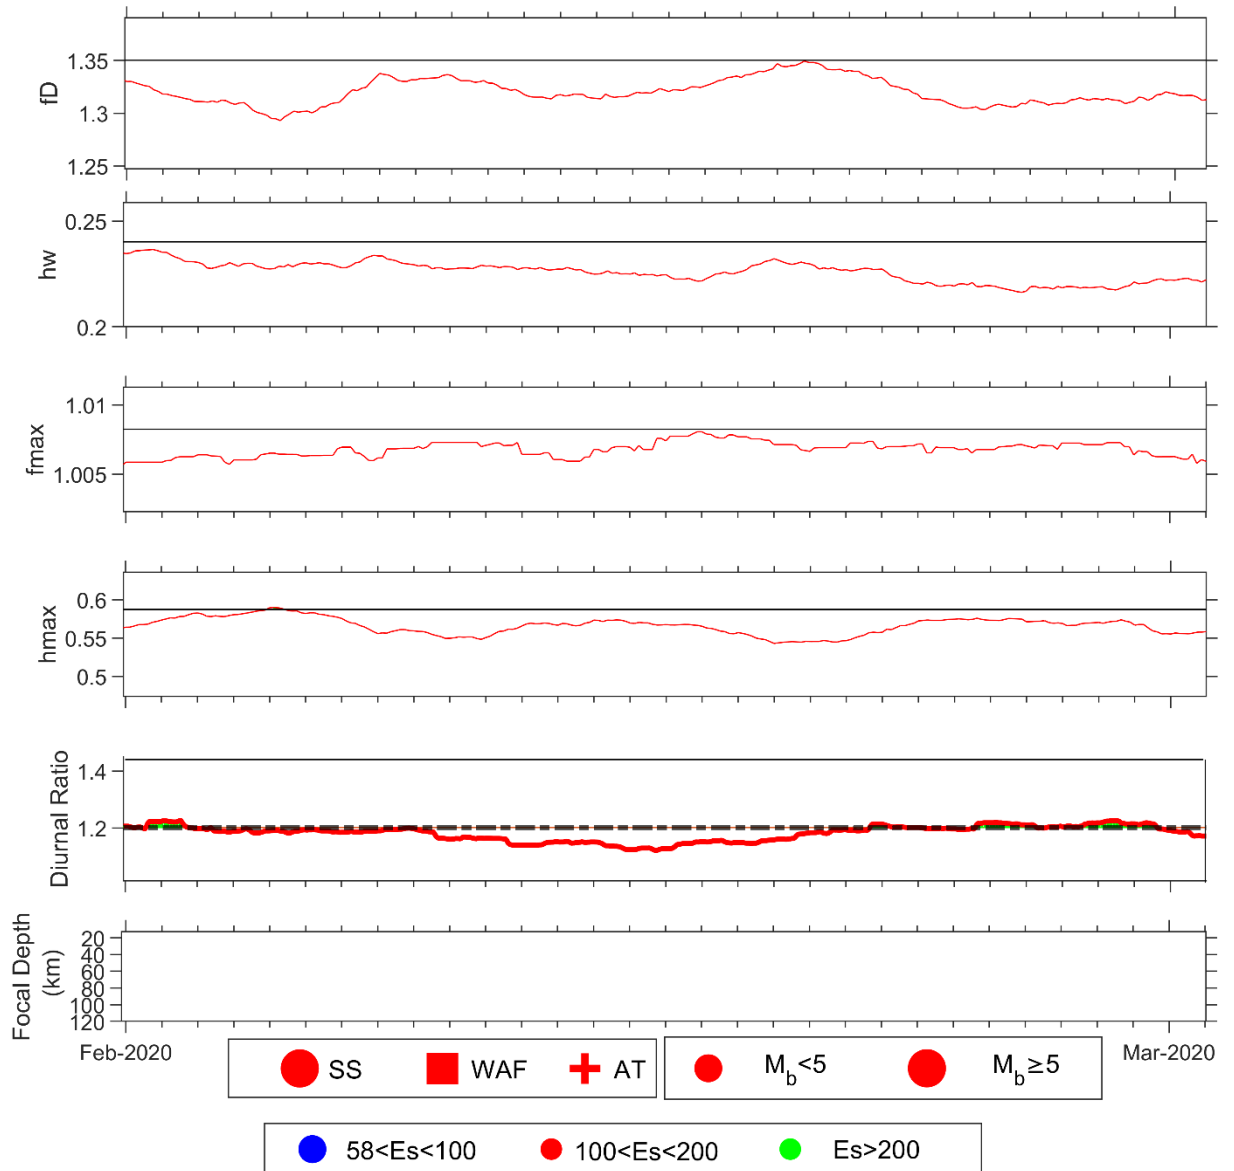

**Figure S15.** The temporal variation for Feb-2020 of components monofractal analysis (a) Higuchi fractal dimension, and multifractal analysis (b) spectrum width component, (c) fmax component, (d) hmax components. Panel (e) and (f) showing the diurnal ratio component and occurrences of earthquakes in same time duration with magnitude and focal depth respectively. The significant enhancements from each component are shaded by green color.



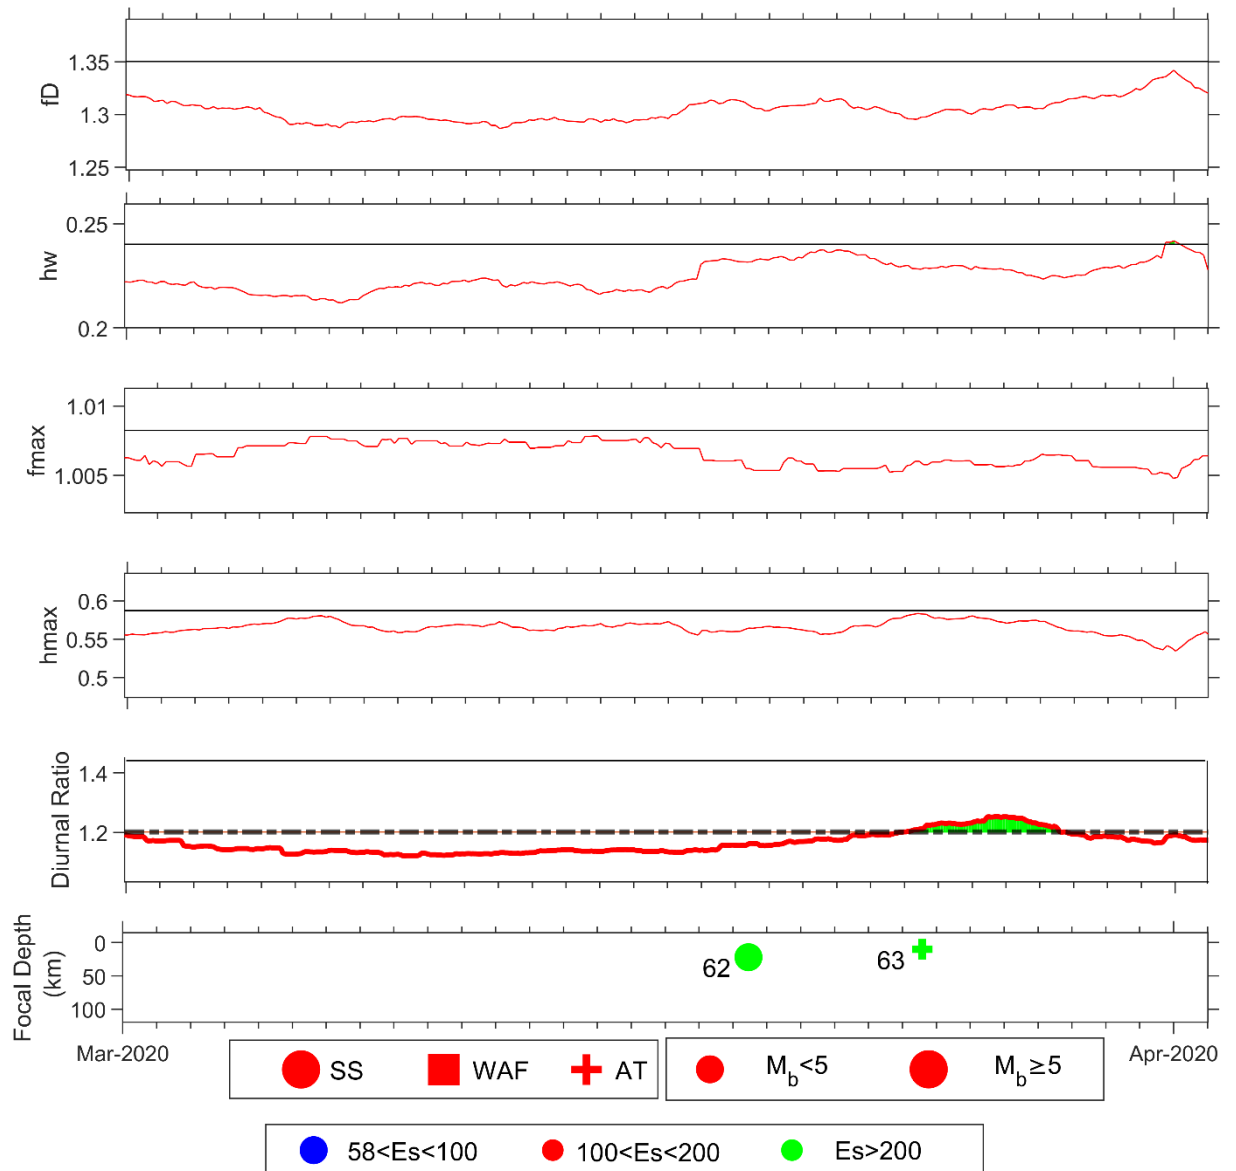

**Figure S16.** The temporal variation for Mar-2020 of components monofractal analysis (a) Higuchi fractal dimension, and multifractal analysis (b) spectrum width component, (c) fmax component, (d) hmax components. Panel (e) and (f) showing the diurnal ratio component and occurrences of earthquakes in same time duration with magnitude and focal depth respectively. The significant enhancements from each component are shaded by green color.

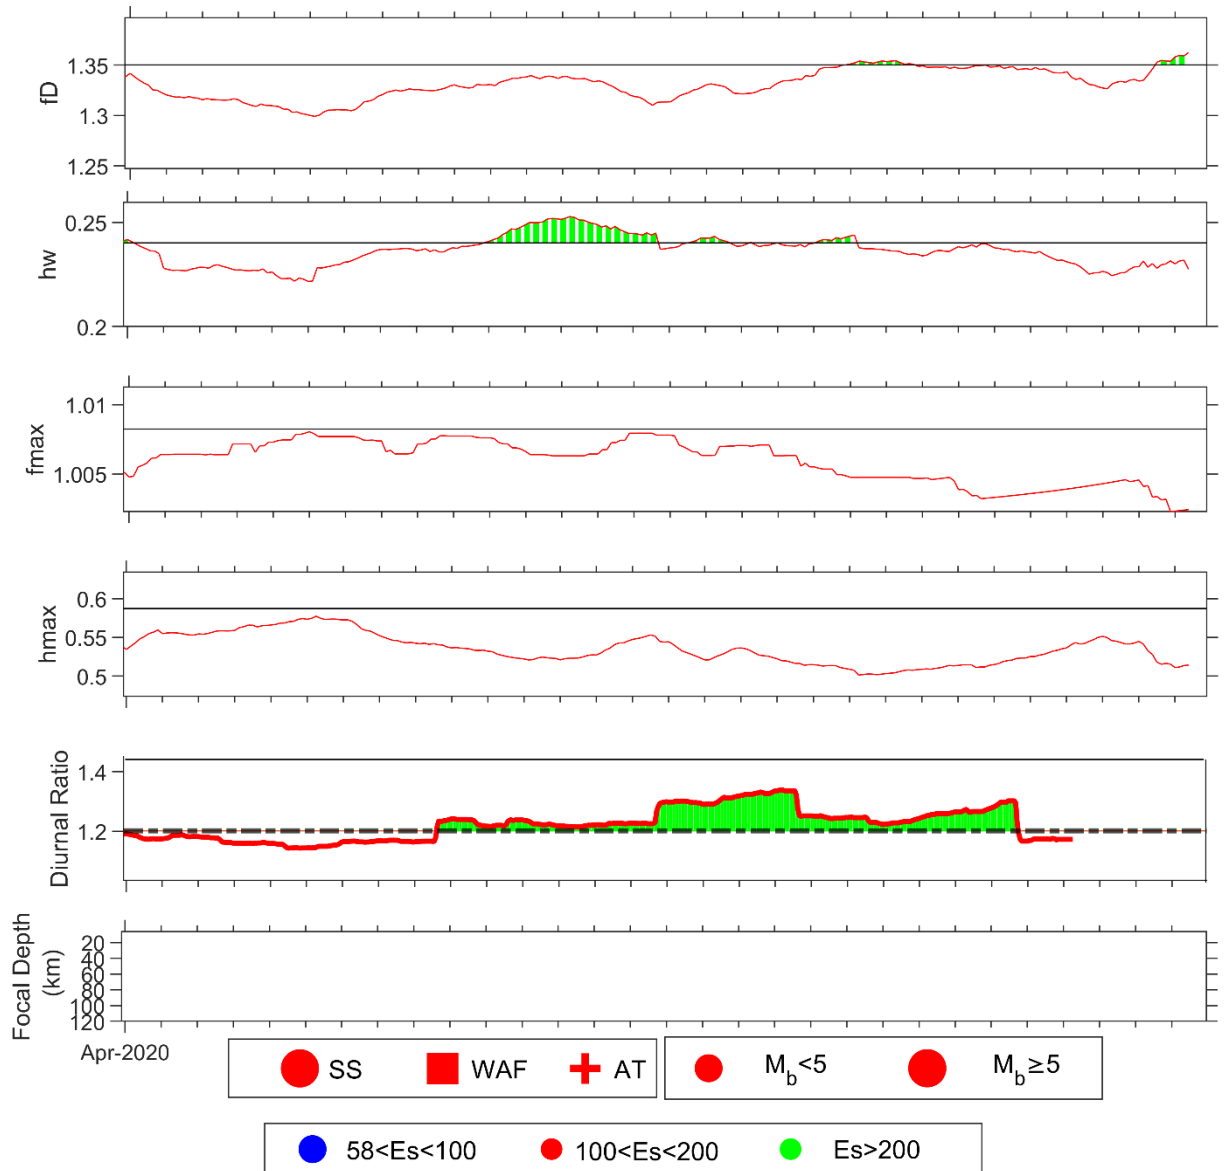

**Figure S17.** The temporal variation for Apr-2020 of components monofractal analysis (a) Higuchi fractal dimension, and multifractal analysis (b) spectrum width component, (c) fmax component, (d) hmax components. Panel (e) and (f) showing the diurnal ratio component and occurrences of earthquakes in same time duration with magnitude and focal depth respectively. The significant enhancements from each component are shaded by green color.

## Comparison of raw data with and without enhancement of fractal parameters on quiet days.

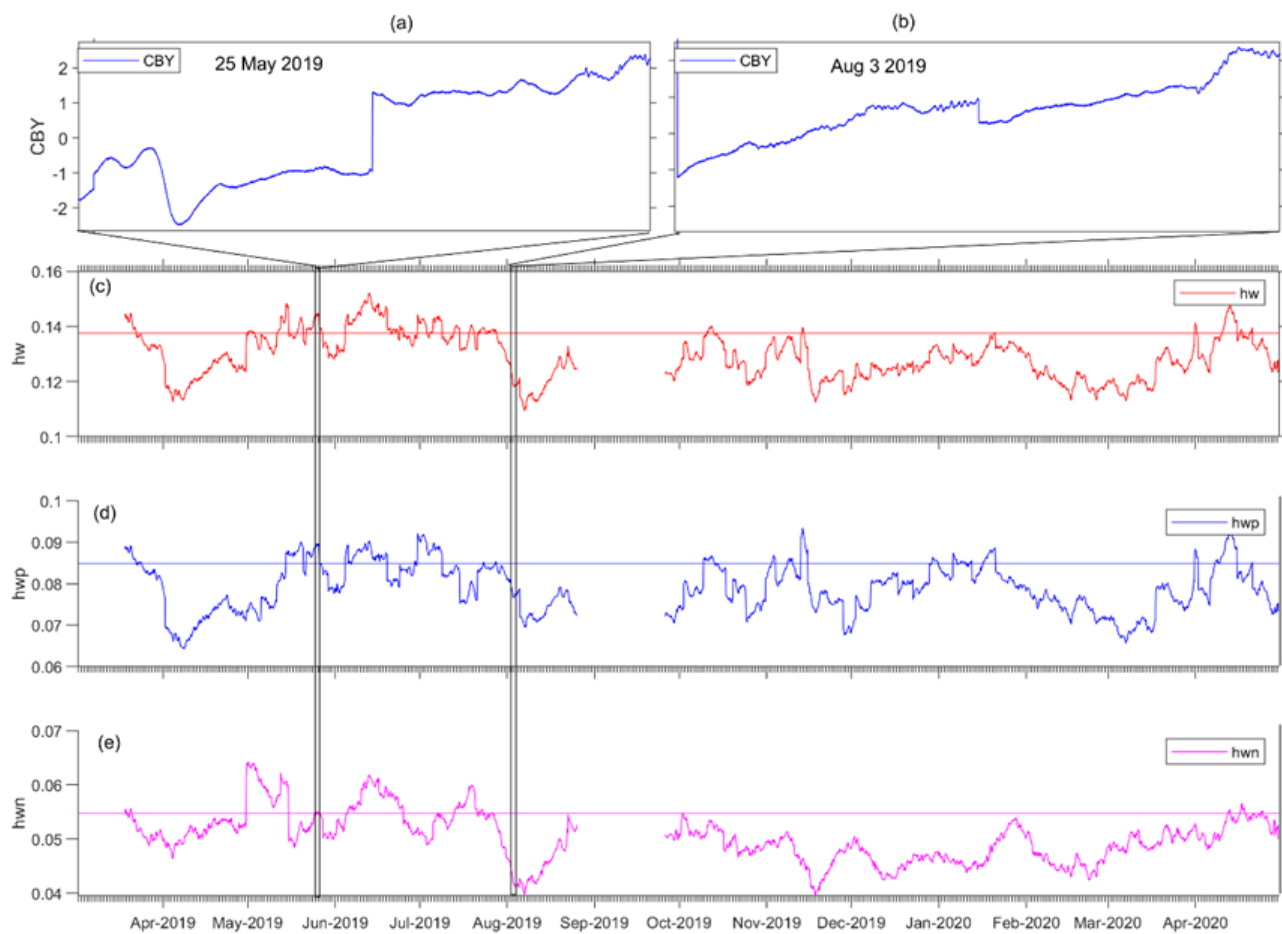

**Figure S18.** The night time data of vertical component of geomagnetic field on (a) 25<sup>th</sup> May, 2019 and (b) 3<sup>rd</sup> Aug, 2019. The multifractal component of (a) hw, (b) hwp, and (c) hwn from Mar, 2019 to April, 2020.

**Table S1.** List of earthquakes with time of occurrence, location, focal depth, and magnitude.

| S.I. | DATE       | TIME     | Epicentre      | Focal-Depth (km) | Magnitude (Mb) |
|------|------------|----------|----------------|------------------|----------------|
| 1    | 31-03-2019 | 23:42:32 | 7.6996,94.2492 | 20               | 4.7            |
| 2    | 31-03-2019 | 23:44:43 | 7.5909,94.1253 | 13               | 4.9            |
| 3    | 31-03-2019 | 23:46:42 | 7.6686,94.1727 | 20               | 5.1            |
| 4    | 31-03-2019 | 23:48:58 | 7.5608,94.1282 | 20               | 4.6            |
| 5    | 31-03-2019 | 23:56:45 | 7.541,94.3568  | 24               | 4.8            |
| 6    | 31-03-2019 | 23:59:48 | 7.7878,94.4918 | 24               | 4.7            |
| 7    | 01-04-2019 | 00:03:44 | 7.6917,94.2339 | 20.9             | 5              |
| 8    | 01-04-2019 | 00:23:39 | 7.6193,94.259  | 24               | 4.7            |
| 9    | 01-04-2019 | 00:25:45 | 7.5951,94.2425 | 23.7             | 4.9            |
| 10   | 01-04-2019 | 00:34:10 | 7.5698,94.3452 | 24               | 4.6            |
| 11   | 01-04-2019 | 00:37:29 | 7.4526,94.2756 | 24               | 4.8            |
| 12   | 01-04-2019 | 00:44:27 | 7.5388,94.3337 | 24               | 4.7            |
| 13   | 01-04-2019 | 00:49:39 | 7.5407,94.1947 | 20               | 4.9            |
| 14   | 01-04-2019 | 00:58:20 | 7.4883,94.219  | 20               | 4.8            |
| 15   | 01-04-2019 | 01:08:08 | 7.5659,94.2647 | 24               | 4.7            |
| 16   | 01-04-2019 | 01:11:44 | 7.5249,94.3343 | 16.9             | 4.9            |
| 17   | 01-04-2019 | 01:21:32 | 7.6171,94.1999 | 20               | 4.7            |
| 18   | 01-04-2019 | 01:22:49 | 7.3636,94.2171 | 20               | 4.6            |
| 19   | 01-04-2019 | 01:23:59 | 7.5703,94.1277 | 17.3             | 5.1            |
| 20   | 01-04-2019 | 01:34:21 | 7.614,94.3289  | 24               | 4.5            |
| 21   | 01-04-2019 | 02:28:05 | 7.728,94.2903  | 10               | 4.6            |
| 22   | 01-04-2019 | 02:46:50 | 7.533,94.2648  | 24               | 4.5            |
| 23   | 01-04-2019 | 02:49:43 | 7.402,94.164   | 20               | 4.5            |
| 24   | 01-04-2019 | 03:21:41 | 7.4521,94.2288 | 20               | 4.5            |
| 25   | 01-04-2019 | 03:38:09 | 7.4656,94.2122 | 20               | 4.8            |
| 26   | 01-04-2019 | 04:09:16 | 7.4718,94.2433 | 20               | 4.8            |
| 27   | 01-04-2019 | 05:09:18 | 7.5492,94.2107 | 20               | 4.8            |
| 28   | 01-04-2019 | 05:52:39 | 7.463,94.2283  | 16.3             | 5              |
| 29   | 01-04-2019 | 06:56:42 | 7.6223,94.2961 | 24               | 4.5            |

|    |            |          |                |       |     |
|----|------------|----------|----------------|-------|-----|
| 30 | 01-04-2019 | 07:37:52 | 7.4665,94.2506 | 28.1  | 4.8 |
| 31 | 01-04-2019 | 08:11:34 | 7.5566,94.1453 | 22.6  | 5.3 |
| 32 | 01-04-2019 | 10:14:06 | 7.4182,94.2619 | 24    | 4.5 |
| 33 | 06-04-2019 | 08:12:47 | 7.3892,94.3412 | 24    | 4.5 |
| 34 | 06-04-2019 | 13:23:07 | 7.3815,94.4192 | 24    | 4.5 |
| 35 | 10-04-2019 | 15:09:33 | 7.5339,94.1907 | 6.6   | 4.5 |
| 36 | 11-04-2019 | 02:39:32 | 7.6655,94.2167 | 27.4  | 5   |
| 37 | 11-04-2019 | 03:50:40 | 7.5952,94.1612 | 22.4  | 5.1 |
| 38 | 11-04-2019 | 03:55:15 | 7.5914,94.1947 | 18.8  | 4.8 |
| 39 | 12-04-2019 | 23:14:03 | 7.2498,94.3414 | 26    | 4.6 |
| 40 | 13-04-2019 | 16:12:57 | 7.3145,94.3829 | 21.6  | 5.3 |
| 41 | 13-04-2019 | 16:20:18 | 7.2623,94.3904 | 24    | 4.7 |
| 42 | 13-04-2019 | 20:43:31 | 7.262,94.3367  | 16.4  | 5   |
| 43 | 14-04-2019 | 08:12:09 | 7.3932,94.3761 | 24    | 4.6 |
| 44 | 18-04-2019 | 21:52:11 | 7.5409,94.2677 | 16.5  | 5   |
| 45 | 18-04-2019 | 21:57:58 | 7.5612,94.2611 | 28.7  | 5   |
| 46 | 16-05-2019 | 06:52:02 | 7.3961,94.2224 | 27.4  | 4.8 |
| 47 | 17-05-2019 | 18:29:24 | 7.5362,94.2358 | 10    | 4.5 |
| 48 | 17-05-2019 | 19:05:20 | 7.586,94.2535  | 16.3  | 4.8 |
| 49 | 19-06-2019 | 12:05:01 | 6.6871,93.4415 | 35    | 4.6 |
| 50 | 09-07-2019 | 09:26:13 | 8.6569,94.0188 | 80    | 4.5 |
| 51 | 09-07-2019 | 11:40:26 | 8.3982,93.7661 | 22    | 4.5 |
| 52 | 21-08-2019 | 09:19:11 | 8.9309,93.4665 | 10    | 4.8 |
| 53 | 17-11-2019 | 01:28:57 | 7.1332,94.4124 | 24.8  | 5.1 |
| 54 | 17-11-2019 | 06:47:06 | 7.1291,94.6991 | 10    | 4.5 |
| 55 | 20-11-2019 | 03:37:08 | 7.2687,94.5378 | 10    | 4.7 |
| 56 | 19-12-2019 | 19:01:52 | 5.1651,94.3996 | 43    | 4.5 |
| 57 | 24-12-2019 | 05:52:58 | 6.9983,92.3125 | 23    | 5   |
| 58 | 30-12-2019 | 16:59:04 | 6.6953,94.4063 | 103.8 | 5   |
| 59 | 06-01-2020 | 15:08:01 | 8.8571,93.5786 | 23    | 4.5 |
| 60 | 22-01-2020 | 19:23:26 | 7.6921,93.9163 | 100   | 4.6 |
| 61 | 28-01-2020 | 20:29:38 | 7.2879,92.0567 | 24    | 4.9 |

|    |            |          |                |    |     |
|----|------------|----------|----------------|----|-----|
| 62 | 19-03-2020 | 12:58:57 | 8.8682,93.8319 | 22 | 4.5 |
| 63 | 24-03-2020 | 15:00:31 | 7.8407,92.2031 | 10 | 4.5 |

**Table S2.** The relationships between the observed significant fractal dimensions (fD) and earthquake (Eq) occurrence are as below:

| Earthquake characteristics |             |           |      |                     |               |             | Anomaly characteristics                                 |                                                                     |          |
|----------------------------|-------------|-----------|------|---------------------|---------------|-------------|---------------------------------------------------------|---------------------------------------------------------------------|----------|
| EQ No.                     | Time of Eq. | Magnitude | fD   | Epicentral Distance | Type of Fault |             | Eq details                                              | Anomaly details                                                     | Lead/lag |
| 49                         | 19-06-2019  | 4.6       | 35   | 60                  | WAF           |             | Mod mag, mod fd, mod epidist                            | One small + one sig enhancement<br>12-13 Jun 2019<br>16-18 Jun 2019 | 7<br>3   |
| 50                         | 09-07-2019  | 4.5       | 80   | 185                 | SS            | 2 diff loc  | Mod mag, Large fd, large epidist+ mod fd, large epidist | Two sig enhancements<br>20-25 Jun 2019<br>29 Jun-2 Jul 2019         | 19<br>10 |
| 51                         | 09-07-2019  | 4.5       | 22   | 156                 | WAF           |             |                                                         |                                                                     |          |
| 52                         | 21-08-2019  | 4.8       | 10   | 219                 | WAF           |             | Mod mag, v. shallow fd, v large epidist                 | No enhancements                                                     |          |
| 53                         | 17-11-2019  | 5.1       | 24.8 | 60                  | SS            | Similar loc | Mod mag, shallow/v shallow fd, mod epidist              | One persistent enhancement<br>6-15 Nov 2019                         | 11       |
| 54                         | 17-11-2019  | 4.5       | 10   | 91                  | SS            |             |                                                         |                                                                     |          |
| 55                         | 20-11-2019  | 4.7       | 10   | 78                  | SS            |             |                                                         |                                                                     | 14       |
| 56                         | 19-12-2019  | 4.5       | 43   | 212                 | WAF           |             | Mod mag, mod fd, v large epidist                        | One persistent enhancement                                          | 18       |

|    |            |     |       |     |     |            |                                             |                                              |                       |
|----|------------|-----|-------|-----|-----|------------|---------------------------------------------|----------------------------------------------|-----------------------|
|    |            |     |       |     |     |            |                                             | 1-14 Dec 2019                                |                       |
| 57 | 24-12-2019 | 5   | 23    | 173 | AT  |            | Mod mag, mod fd, v large epidist            | Minor enhancement<br>18-23 Dec 2019          | 6                     |
| 58 | 30-12-2019 | 5   | 103.8 | 67  | SS  |            | Mod mag, v large fd, mod epidist            | Minor enhancement<br>27-31 Dec 2019          | 3 and co              |
| 59 | 06-01-2020 | 4.5 | 23    | 209 | WAF |            | Mod mag, mod fd, v large epidist            | No enhancements                              |                       |
| 60 | 22-01-2020 | 4.6 | 100   | 77  | WAF | 2 diff loc | Mod mag, v deep/mod fd, mod/v large epidist | One persistent enhancement<br>16-28 Jan 2020 | 6 and co<br>12 and co |
| 61 | 28-01-2020 | 4.9 | 24    | 204 | AT  |            |                                             |                                              |                       |
| 62 | 19-03-2020 | 4.5 | 22    | 207 | SS  | 2 diff loc | Mod mag, shallow fd, v large epidist        | No enhancements                              |                       |
| 63 | 24-03-2020 | 4.5 | 10    | 208 | AT  |            |                                             |                                              |                       |



**Table S3.** The relationships between the observed significant multifractal width parameter and earthquake occurrence are as below:

| Earthquake characteristics |                          |      |      |                      |       |  | Anomaly characteristics      |                                                                |                                                                     |                                                                                  |                            |
|----------------------------|--------------------------|------|------|----------------------|-------|--|------------------------------|----------------------------------------------------------------|---------------------------------------------------------------------|----------------------------------------------------------------------------------|----------------------------|
| Eq. No.                    | Time of Eq.              | Mag. | fD.  | Epice ntral distance | Fault |  | Hw                           | Hwp                                                            | Hwn                                                                 | Lead/L ag time (in Days)                                                         |                            |
| 1-45                       | 31-03-2019<br>18-04-2019 |      |      |                      | SS    |  |                              | One small enhancement<br><br>17-22 Mar, 2019                   | One small enhancement<br><br>17-20 Mar, 2019                        | One small enhancement<br><br>17-20 Mar                                           | 14                         |
| 46                         | 16-05-2019               | 4.5  | 27.4 | 58                   | SS    |  | Mod mag, mod fd, mod epidist | One small enhancement<br><br>14 May, 2019                      | Two small enhancements<br>14-15, 17-20, May, 2019                   | One persistence, two small enhancements<br>29 Mar-5 May, 2019<br>12,14 May, 2019 | 2                          |
| 47                         | 17-05-2019               | 4.8  | 10   | 71                   | SS    |  |                              |                                                                |                                                                     |                                                                                  | Co and post                |
| 48                         | 17-05-2019               | 4.8  | 16   | 71                   | SS    |  |                              |                                                                |                                                                     |                                                                                  | 16                         |
| 49                         | 19-06-2019               | 4.6  | 65   | 60                   | WAF   |  | Mod mag, mod fd, mod epidist | One minor, One sig. persistence enhancement<br>23-25 May, 2019 | Two Persistence, One small, 22-25 May, 2019<br>4Jun, 7-18 Jun, 2019 | One persistence<br>8-22 Jun, 2019                                                | 26<br>15 to co<br>12<br>10 |



|    |            |     |    |     |           |                       |                                            |                       |                 |                    |    |
|----|------------|-----|----|-----|-----------|-----------------------|--------------------------------------------|-----------------------|-----------------|--------------------|----|
| 62 | 19-03-2020 | 4.5 | 22 | 207 | SS,<br>AT | different<br>location | Mod mag,<br>shallow fd, v<br>large epidist | No<br>enhancem<br>ent | No enhancement  | No<br>enhancement  |    |
| 63 | 24-03-2020 | 4.5 | 10 | 207 | AT        |                       |                                            |                       |                 |                    |    |
|    | NO events  |     |    |     |           |                       |                                            | 10-14 Apr,<br>2020    | 10-14 Apr, 2020 | 11-12 Apr,<br>2019 | NA |

**Table S4.** The relationships between the observed significant holder exponent parameter and earthquake occurrence are as below:

| Earthquake characteristics |                          |             |      |                           |                                    | Anomaly characteristics                                                       |                                              |                                              |                                              |                                   |  |
|----------------------------|--------------------------|-------------|------|---------------------------|------------------------------------|-------------------------------------------------------------------------------|----------------------------------------------|----------------------------------------------|----------------------------------------------|-----------------------------------|--|
| Eq. No.                    | Time of Earthquake       | Magnit ude. | fD.  | Epicentral Distance. (km) |                                    | fmax                                                                          | H (0)                                        | Hmax                                         | Hmin                                         | Lead\ Lag time                    |  |
| 1-45                       | 31-03-2019<br>18-04-2019 |             |      |                           |                                    | One persistence enhancement<br>2-18 Apr 2019                                  | One small enhancement<br>2-10 Apr 2019       | One small enhancement<br>2-10 Apr            | One small enhancement<br>2-10 Apr            | Co                                |  |
| 46                         | 16-05-2019               | 4.5         | 27.4 | 58                        | Mod mag,<br>mod fd,<br>mod epidist | One significant and two small enhancements<br>7-14 May 2019<br>17-19 May 2019 | One significant enhancement<br>6-14 May 2019 | One significant enhancement<br>5-14 May 2019 | One significant enhancement<br>7-11 May 2019 | 9<br>Co and post<br>10<br>11<br>9 |  |
| 47                         | 17-05-2019               | 4.8         | 10   | 71                        |                                    |                                                                               |                                              |                                              |                                              |                                   |  |
| 48                         | 17-05-2019               | 4.8         | 16   | 71                        |                                    |                                                                               |                                              |                                              |                                              |                                   |  |
| 49                         | 19-06-2019               | 4.6         | 65   | 60                        | Mod mag,<br>mod fd,<br>mod epidist | One small enhancement                                                         |                                              |                                              |                                              | 29                                |  |

|    |            |     |      |     |                             |                                                               |                                                                  |                                                         |                                                   |                                                         |                                          |  |
|----|------------|-----|------|-----|-----------------------------|---------------------------------------------------------------|------------------------------------------------------------------|---------------------------------------------------------|---------------------------------------------------|---------------------------------------------------------|------------------------------------------|--|
|    |            |     |      |     |                             |                                                               | 20-21 May<br>2019                                                |                                                         |                                                   |                                                         |                                          |  |
| 50 | 09-07-2019 | 4.5 | 80   | 185 | 2<br>Diff<br>locat<br>ion   | Mod<br>mag,<br>Large<br>fd,<br>large                          | No enhancements                                                  |                                                         |                                                   |                                                         |                                          |  |
| 51 | 09-07-2019 | 4.5 | 22   | 156 |                             |                                                               |                                                                  |                                                         |                                                   |                                                         |                                          |  |
| 52 | 21-08-2019 | 4.8 | 10   | 219 |                             | Mod<br>mag, v.<br>shallow<br>fd, v<br>large<br>epidist        | Two small<br>enhancemen<br>ts<br>15-16 Jul<br>2019<br>6-Aug 2019 |                                                         |                                                   | Two small<br>enhancemen<br>ts<br>6 Aug 2019             | 35<br>15                                 |  |
| 53 | 17-11-2019 | 5.1 | 24.8 | 60  | Simi<br>lar<br>locat<br>ion | Mod<br>mag,<br>shallow<br>/v<br>shallow<br>fd, mod<br>epidist | 1 small<br>enhancemen<br>t and one<br>persistence                | 1 small<br>enhancemen<br>t and one<br>persistence       | 1 small<br>enhancement<br>and one<br>persistence  | 1 small<br>enhancemen<br>t and one<br>persistence       | 50<br>28<br>17<br>1 & co<br>25<br>1 & co |  |
| 54 | 17-11-2019 | 5.1 | 10   | 91  |                             |                                                               |                                                                  |                                                         |                                                   |                                                         |                                          |  |
| 55 | 20-11-2019 | 4.7 | 10   | 78  |                             |                                                               | 26-28 Sep<br>2019<br>19 Oct-2<br>Nov 2019                        | 26 Sep-5<br>Oct<br>20 Oct-1<br>Nov<br>16-24 Nov<br>2019 | 26 Sep-6 Oct<br>22 Oct-3 Nov<br>16-26 Nov<br>2019 | 26 sep-6<br>Oct<br>20 Oct-2<br>Nov<br>16-24 Nov<br>2019 |                                          |  |
| 56 | 19-12-2019 | 4.5 | 43   | 212 |                             | Mod<br>mag,<br>mod fd,<br>v large<br>epidist                  |                                                                  |                                                         |                                                   |                                                         | No<br>enhance<br>ment                    |  |
| 57 | 24-12-2019 | 5   | 23   | 173 |                             | Mod<br>mag,<br>mod fd,<br>v large<br>epidist                  |                                                                  |                                                         |                                                   |                                                         |                                          |  |
| 58 | 30-12-2019 | 5   | 103  | 67  |                             | Mod<br>mag, v<br>large                                        |                                                                  |                                                         |                                                   |                                                         |                                          |  |

|    |            |     |     |     |                               |                                                                |  |  |                                     |       |        |    |
|----|------------|-----|-----|-----|-------------------------------|----------------------------------------------------------------|--|--|-------------------------------------|-------|--------|----|
|    |            |     |     |     |                               | fd, mod<br>epidist                                             |  |  |                                     |       |        |    |
| 59 | 06-01-2020 | 4.5 | 23  | 209 |                               | Mod<br>mag,<br>mod fd,<br>v large<br>epidist                   |  |  | One small<br>enhancement<br>3-8 Jan |       | 3 & Co |    |
| 60 | 22-01-2020 | 4.6 | 100 | 77  | Diff<br>erent<br>locat<br>ion | Mod<br>mag, v<br>deep/m<br>od fd,<br>mod/v<br>large<br>epidist |  |  |                                     |       | 19     |    |
| 61 | 28-01-2020 | 4.9 | 24  | 204 |                               |                                                                |  |  |                                     |       |        | 25 |
| 62 | 19-03-2020 | 4.5 | 22  | 207 | Diff<br>erent<br>locat<br>ion | Mod<br>mag,<br>shallow<br>fd, v<br>large<br>epidist            |  |  | One small<br>enhancement            |       | 44     |    |
| 63 | 24-03-2020 | 4.5 | 10  | 207 |                               |                                                                |  |  |                                     | 4 Feb |        | 47 |
